# Supplementary material for: An Inulin-Type Fructan CP-A from Codonopsis pilosula Alleviated 5-Fluorouracil-Induced Intestinal Mucositis via the ERK/MLCK/MLC2 Pathway and Regulation of Gut Microbiota
Source: MDPI journal article supplement (doi:10.3390/ph17030297), 2024-02-26
Supplement: s1 [file s1]

# **An Inulin-Type Fructan CP-A from *Codonopsis pilosula* Alleviated 5-Fluorouracil-Induced Intestinal Mucositis via ERK/MLCK/MLC2 Pathway and Regulation of Gut Microbiota**

Jiangtao Zhou <sup>1,2,3,†</sup>, Deyun Li <sup>1,†</sup>, Jiajing Wang <sup>1</sup>, Zhuoyang Cheng <sup>1,2,3</sup>,

Changjian Wang <sup>1</sup>, Xuepeng Zhang <sup>1</sup>, Xiexin Xu <sup>1</sup>, Jianping Gao <sup>1,2,3,\*</sup>

1 School of Pharmacy, Shanxi Medical University, Taiyuan 030001, China

2 Medicinal Basic Research Innovation Center of Chronic Kidney Disease, Ministry of Education, Shanxi Medical University, Taiyuan 030001, China

3 Shanxi Provincial Key Laboratory of Drug Synthesis and Novel Pharmaceutical Preparation Technology, Shanxi Medical University, Taiyuan 030001, China

\* Corresponding: jpgao123@163.com

† These authors contributed equally to this work

**Table S1** Sequences of the primers used in the RT-PCR

| Gene          | Primer  | Gene sequence (5'-3')           |
|---------------|---------|---------------------------------|
| IL-4          | Forward | ACA AGG AAC ACC ACG GAG AAC G   |
|               | Reverse | TCT TCA AGC ACG GAG GTA CAT CAC |
| IL-6          | Forward | GCC TTC TTG GGA CTG ATG TTG TTG |
|               | Reverse | GTC TGT TGT GGG TGG TAT CCT CTG |
| IL-10         | Forward | AAG GCA GTG GAG CAG GTG AAG     |
|               | Reverse | TGA GTA TCA CGT AGG CTT CTA TGC |
| TNF- $\alpha$ | Forward | CCG AGA TGT GGA ACT GGC AGA G   |
|               | Reverse | CCA CGA GCA GGA ATG AGA AGA GG  |
| ERK1/2        | Forward | GTT CCC AAA CGC TGA CTC CAA AG  |
|               | Reverse | GCC AGA GCC TGT TCA ACT TCA ATC |
| MLCK          | Forward | TTC AAG ATG GTG GTG GCT GTG G   |
|               | Reverse | TGC TTG CTC CTT GTT CTC CTC AG  |

**Table S2** Relative abundance of the most representative phyla in experimental rats

| Phylum                          | Control                | 5-FU        | BTC         | CP-A L      | CP-A M       | CP-A H       | Variation (5-FU) |
|---------------------------------|------------------------|-------------|-------------|-------------|--------------|--------------|------------------|
|                                 | Relative abundance (%) |             |             |             |              |              |                  |
| Firmicutes                      | 89.49±2.13**           | 62.86±12.86 | 80.66±3.20* | 85.25±4.69* | 86.32±2.08** | 89.90±2.01** | ↓                |
| Proteobacteria                  | 2.00±0.14**            | 27.03±11.78 | 7.58±3.80*  | 6.71±3.02*  | 4.50±1.14**  | 1.67±0.21**  | ↑                |
| Bacteroidetes                   | 6.97±1.74              | 6.54±2.54   | 9.95±2.23   | 3.24±1.29   | 5.26±2.09    | 6.63±1.83    | ↑                |
| Actinobacteria                  | 0.67±0.17              | 2.57±0.94   | 1.01±0.65   | 3.93±1.34   | 2.64±0.19    | 1.15±0.60    | ↑                |
| Tenericutes                     | 0.16±0.10              | 0.22±0.19   | 0.06±0.01   | 0.29±0.11   | 0.41±0.23    | 0.12±0.07    | ↑                |
| Cyanobacteria                   | 0.17±0.02              | 0.16±0.02   | 0.15±0.01   | 0.16±0.02   | 0.18±0.03    | 0.11±0.01    | ↓                |
| Verrucomicrobia                 | 0.02±0.01              | 0.02±0.01   | 0.02±0.01   | 0.03±0.02   | 0.06±0.02    | 0.01±0.01    | ↓                |
| TM7                             | 0.01±0.01              | 0.00±0.00   | 0.00±0.00   | 0.07±0.06   | 0.02±0.01    | 0.01±0.00    | ↓                |
| Elusimicrobia                   | 0.01±0.01              | 0.00±0.00   | 0.00±0.00   | 0.07±0.06*  | 0.02±0.01    | 0.01±0.00    | ↓                |
| Firmicutes/ Bacteroidetes (F/B) | 22.77±10.17            | 45.39±27.02 | 11.56±3.39  | 85.31±50.40 | 56.40±35.74  | 19.87±4.97   | ↑                |

Values were represented the mean±SEM.

Kruskal-Wallis test was applied for statistics and \* $p < 0.05$  and \*\* $p < 0.01$  versus 5-FU group (n = 6).

**Table S3** Relative abundance of the most representative classes in experimental rats

| Phylum         | Class               | Control<br>Relative abundance (%) | 5-FU        | BTC           | CP-A L       | CP-A M      | CP-A H       | Variation (5-FU) |
|----------------|---------------------|-----------------------------------|-------------|---------------|--------------|-------------|--------------|------------------|
| Firmicutes     | Clostridia          | 35.97±3.48                        | 43.28±6.54  | 27.71±8.12    | 44.58±9.58   | 46.50±9.99  | 24.43±2.61   | ↑                |
|                | Bacilli             | 50.23±5.06**                      | 13.38±5.85  | 50.28±10.24** | 37.41±12.35* | 30.32±7.72  | 61.39±4.20** | ↓                |
|                | Erysipelotrichi     | 2.86±1.12                         | 5.97±1.91   | 2.39±0.85     | 3.01±1.28    | 9.23±2.67   | 3.81±2.52    | ↑                |
| Actinobacteria | Coriobacteriia      | 0.31±0.04*                        | 1.99±0.89   | 0.89±0.66     | 1.18±0.53    | 0.85±0.19   | 0.57±0.29    | ↑                |
|                | Actinobacteria      | 0.35±0.15                         | 0.57±0.49   | 0.12±0.03     | 2.75±1.45*   | 1.79±0.22   | 0.57±0.33    | ↑                |
| Proteobacteria | Alphaproteobacteria | 0.43±0.08**                       | 0.22±0.02   | 0.24±0.02     | 0.28±0.03    | 0.32±0.04   | 0.21±0.01    | ↓                |
|                | Betaproteobacteria  | 0.42±0.04                         | 0.25±0.03   | 0.28±0.03     | 0.52±0.21    | 0.37±0.06   | 0.18±0.02    | ↓                |
|                | Gammaproteobacteria | 0.59±0.08**                       | 25.44±11.94 | 6.03±3.42*    | 1.95±0.63**  | 2.47±1.37** | 0.74±0.14**  | ↑                |
|                | Deltaproteobacteria | 0.53±0.14                         | 0.99±0.28   | 0.95±0.33     | 3.92±2.44    | 1.06±0.33   | 0.47±0.14    | ↑                |
| Bacteroidetes  | Bacteroidia         | 6.96±1.74                         | 6.53±2.54   | 9.95±2.23     | 3.23±1.29    | 5.25±2.09   | 6.60±1.83    | ↓                |

Values were represented the mean±SEM.

Kruskal-Wallis test was applied for statistics and \* $p < 0.05$  and \*\* $p < 0.01$  versus 5-FU group (n = 6).

**Table S4** Relative abundance of the most representative orders in experimental rats

| Phylum         | Order              | Control                | 5-FU        | BTC           | CP-A L       | CP-A M      | CP-A H       | Variation (5-FU) |
|----------------|--------------------|------------------------|-------------|---------------|--------------|-------------|--------------|------------------|
|                |                    | Relative abundance (%) |             |               |              |             |              |                  |
| Firmicutes     | Clostridiales      | 35.97±3.48             | 43.27±6.54  | 27.70±8.12    | 44.58±9.58   | 46.49±9.99  | 24.43±2.61   | ↑                |
|                | Lactobacillales    | 50.07±5.08**           | 12.96±5.68  | 50.22±10.23** | 37.23±12.36* | 29.97±7.64  | 60.60±4.82** | ↓                |
|                | Erysipelotrichales | 2.86±1.12              | 5.97±1.91   | 2.39±0.85     | 3.01±1.28    | 9.23±2.67   | 3.81±2.52    | ↑                |
| Proteobacteria | Desulfovibrionales | 0.52±0.14              | 0.99±0.28   | 0.95±0.33     | 3.92±2.44    | 1.05±0.33   | 0.47±0.14    | ↑                |
|                | Burkholderiales    | 0.42±0.04              | 0.25±0.03   | 0.28±0.03     | 0.51±0.21    | 0.37±0.06   | 0.18±0.02    | ↓                |
|                | Enterobacteriales  | 0.27±0.08**            | 25.11±11.93 | 5.79±3.43*    | 1.33±0.69**  | 2.20±1.38** | 0.45±0.16**  | ↑                |
|                | Pseudomonadales    | 0.28±0.02              | 0.23±0.03   | 0.20±0.03     | 0.57±0.33    | 0.21±0.04   | 0.22±0.04    | ↓                |
| Actinobacteria | Coriobacteriales   | 0.31±0.04              | 1.99±0.89   | 0.89±0.66     | 1.18±0.53    | 0.85±0.19   | 0.57±0.29    | ↑                |
|                | Actinomycetales    | 0.32±0.16              | 0.50±0.45   | 0.07±0.01     | 2.71±1.45*   | 1.09±0.36   | 0.38±0.30    | ↑                |
| Bacteroidetes  | Bacteroidales      | 6.96±1.74              | 6.53±2.54   | 9.95±2.23     | 3.23±1.29    | 5.25±2.09   | 6.60±1.83    | ↓                |

Values were represented the mean±SEM.

Kruskal-Wallis test was applied for statistics and \* $P < 0.05$  and \*\* $p < 0.01$  versus 5-FU group (n = 6).

**Table S5** Relative abundance of the most representative families in experimental rats

| Phylum         | Family                | Control                | 5-FU        | BTC           | CP-A L       | CP-A M      | CP-A H       | Variation (5-FU) |
|----------------|-----------------------|------------------------|-------------|---------------|--------------|-------------|--------------|------------------|
|                |                       | Relative abundance (%) |             |               |              |             |              |                  |
| Firmicutes     | Lactobacillaceae      | 49.29±5.19**           | 11.60±5.33  | 49.90±10.17** | 33.05±13.36* | 27.86±7.54  | 59.44±5.59** | ↓                |
|                | S24-7                 | 4.82±0.88              | 3.43±1.25   | 7.23±1.78*    | 1.97±0.53    | 3.77±1.26   | 5.45±1.54    | ↓                |
|                | Peptostreptococcaceae | 2.84±0.97              | 4.52±2.36   | 2.32±0.97     | 5.73±1.55    | 3.70±1.09   | 2.39±0.63    | ↑                |
|                | Clostridiaceae        | 1.04±0.28              | 1.29±0.56   | 0.36±0.06     | 0.74±0.20    | 0.64±0.14   | 0.53±0.13    | ↑                |
|                | Erysipelotrichaceae   | 2.86±1.12              | 5.97±1.91   | 2.39±0.85     | 3.01±1.28    | 9.23±2.67   | 3.81±2.52    | ↑                |
|                | Ruminococcaceae       | 16.33±2.24             | 8.27±3.28   | 7.56±2.20     | 16.81±4.27   | 16.60±7.39  | 7.40±1.77    | ↓                |
|                | Lachnospiraceae       | 8.78±2.44*             | 23.20±6.25  | 11.74±5.17    | 11.55±4.13   | 17.21±5.44  | 9.08±1.16*   | ↑                |
| Proteobacteria | Enterobacteriaceae    | 0.27±0.08**            | 25.11±11.93 | 5.79±3.43*    | 1.33±0.69**  | 2.20±1.38** | 0.45±0.16**  | ↑                |
|                | Desulfovibrionaceae   | 0.52±0.14              | 0.99±0.28   | 0.94±0.33     | 3.92±2.44    | 1.05±0.33   | 0.47±0.14    | ↑                |
| Actinobacteria | Coriobacteriaceae     | 0.31±0.04**            | 1.99±0.89   | 0.89±0.66     | 1.18±0.53    | 0.85±0.19   | 0.57±0.29    | ↑                |

Values were represented the mean±SEM.

Kruskal-Wallis test was applied for statistics and \* $p < 0.05$  and \*\* $p < 0.01$  versus 5-FU group (n = 6).

**Table S6** Relative abundance of the most representative families in experimental rats

| Phylum         | Genus                        | Control                | 5-FU        | BTC          | CP-A L      | CP-A M      | CP-A H       | Variation (5-FU) |
|----------------|------------------------------|------------------------|-------------|--------------|-------------|-------------|--------------|------------------|
|                |                              | Relative abundance (%) |             |              |             |             |              |                  |
| Firmicutes     | Lactobacillus                | 48.89±5.22**           | 11.34±5.21  | 49.42±10.08* | 32.92±13.33 | 27.66±7.49  | 59.21±5.60** | ↓                |
|                | Oscillospira                 | 0.60±0.22              | 2.45±1.71   | 0.77±0.40    | 3.21±1.37   | 1.17±0.25   | 0.84±0.47    | ↑                |
|                | Blautia                      | 4.19±1.69              | 10.69±5.44  | 3.06±0.89*   | 1.84±0.58*  | 4.68±1.70   | 3.72±0.97    | ↑                |
|                | Dorea                        | 0.42±0.20              | 2.35±0.79   | 2.25±1.77    | 1.53±1.05   | 0.54±0.26   | 0.29±0.08    | ↑                |
|                | Ruminococcaceae_Ruminococcus | 1.79±0.73*             | 0.39±0.16   | 1.22±0.48    | 0.69±0.25   | 0.77±0.18   | 0.87±0.26    | ↓                |
|                | Subdoligranulum              | 2.30±1.93              | 0.44±0.23   | 1.08±1.00    | 1.71±1.01   | 1.54±1.18   | 0.62±0.32    | ↓                |
| Bacteroidetes  | Bacteroides                  | 0.10±0.03*             | 1.88±1.23   | 0.78±0.27    | 0.47±0.36   | 0.86±0.62   | 0.25±0.03    | ↑                |
| Proteobacteria | Shigella                     | 0.16±0.04**            | 24.25±11.64 | 5.45±3.33*   | 1.13±0.67** | 2.00±1.34** | 0.36±0.16**  | ↑                |
|                | Desulfovibrio                | 0.45±0.13              | 0.79±0.22   | 0.67±0.19    | 2.33±1.17*  | 0.91±0.29   | 0.38±0.12    | ↑                |
| Tenericutes    | Allobaculum                  | 2.21±1.14              | 5.60±1.82   | 1.59±0.86    | 2.36±1.36   | 8.54±2.80   | 2.74±2.64    | ↑                |

Values were represented the mean±SEM.

Kruskal-Wallis test was applied for statistics and \* $p < 0.05$  and \*\* $p < 0.01$  versus 5-FU group (n = 6).
